# Supplementary material for: Defect engineering via the F-doping of β-MnO2 cathode to design hierarchical spheres of interlaced nanosheets for superior high-rate aqueous zinc ion batteries
Source: Royal Society of Chemistry journal article supplement (doi:10.1039/d1ta04051k), 2021-01-01
Supplement: d1ta04051k1.pdf [file d1ta04051k1.pdf]

## Supporting Information

# Defect engineering via the F-doping of $\beta$ -MnO<sub>2</sub> cathode to design hierarchical spheres of interlaced nanosheets for superior high-rate aqueous zinc ion batteries

Seoyeong Kim<sup>a,1</sup>, Bon-Ryul Koo<sup>b,c,1</sup>, Yong-Ryun Jo<sup>d</sup>, Ha-Rim An<sup>e</sup>, Young-Geun Lee<sup>a</sup>, Chun Huang<sup>b,c\*</sup>, Geon-Hyoung An<sup>a,f\*\*</sup>

<sup>a</sup>Department of Energy Engineering, Gyeongsang National University, Jinju, Republic of Korea

<sup>b</sup>Department of Engineering, King's College London, London WC2R 2LS, UK

<sup>c</sup>Department of Materials, University of Oxford, Oxford, OX1 3PH, UK

<sup>d</sup>Advanced Photonics Research Institute (APRI)

<sup>e</sup>Center for Research Equipment, Korea Basic Science Institute, Daejeon 34133, Republic of Korea

<sup>f</sup>Future Convergence Technology Research Institute, Gyeongsang National University, Jinju, Republic of Korea

---

\*Corresponding author.

E-mail address: ann.huang@kcl.ac.uk (C. Huang)

\*\* Corresponding author.

E-mail address: ghan@gnu.ac.kr (G.-H. An)

<sup>1</sup>These authors contributed equally to this work.

**Table S1.** Comparison of specific surface area and pore volume among all samples.

| Samples             | $S_{\text{BET}}$ ( $\text{m}^2 \text{g}^{-1}$ ) | Total pore volume ( $\text{cm}^3 \text{g}^{-1}$ ) |
|---------------------|-------------------------------------------------|---------------------------------------------------|
| Bare $\text{MnO}_2$ | 14.86                                           | 0.08                                              |
| 4F- $\text{MnO}_2$  | 26.88                                           | 0.09                                              |
| 5F- $\text{MnO}_2$  | 79.37                                           | 0.15                                              |
| 6F- $\text{MnO}_2$  | 53.84                                           | 0.11                                              |

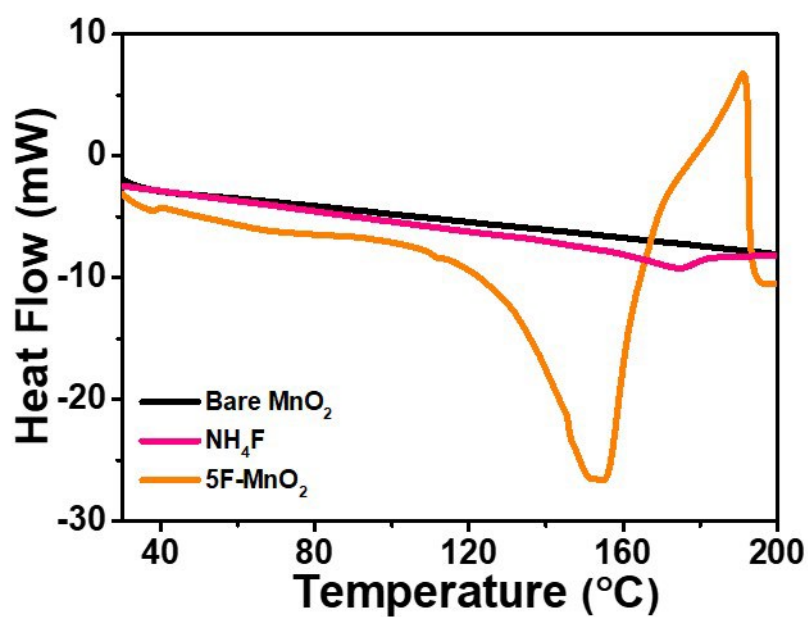

**Fig. S1.** (a) DSC curve of bare  $\text{MnO}_2$ ,  $\text{NH}_4\text{F}$ , and 5F- $\text{MnO}_2$  measured in range from room temperature to 200 °C of air atmosphere.

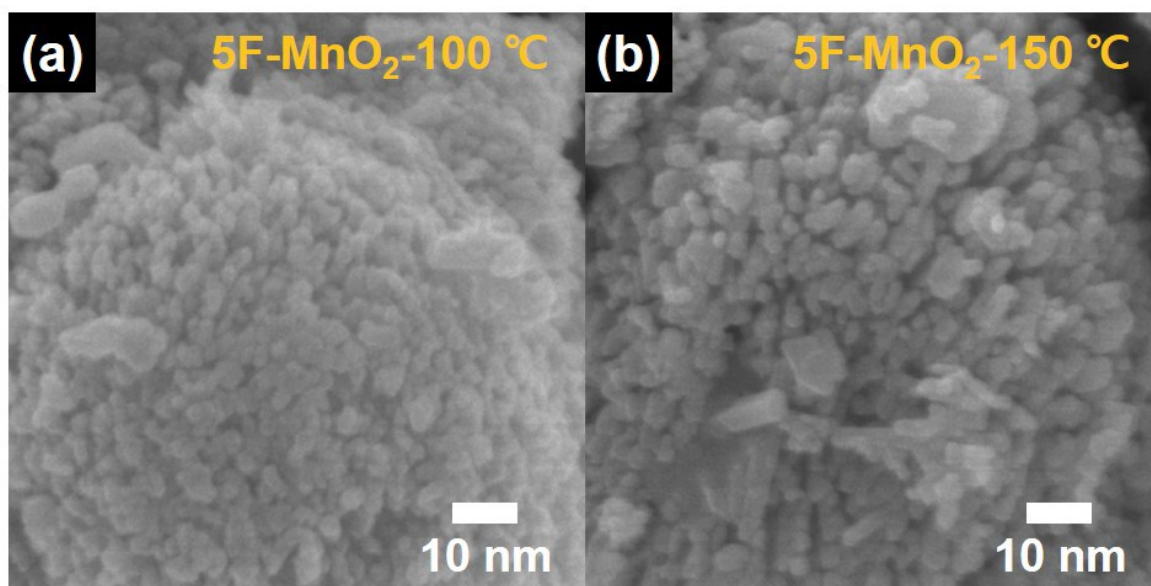

**Fig. S2.** High-magnification SEM images of 5F-MnO<sub>2</sub> obtained at different calcination temperature of (a) 100 °C and (b) 150 °C.

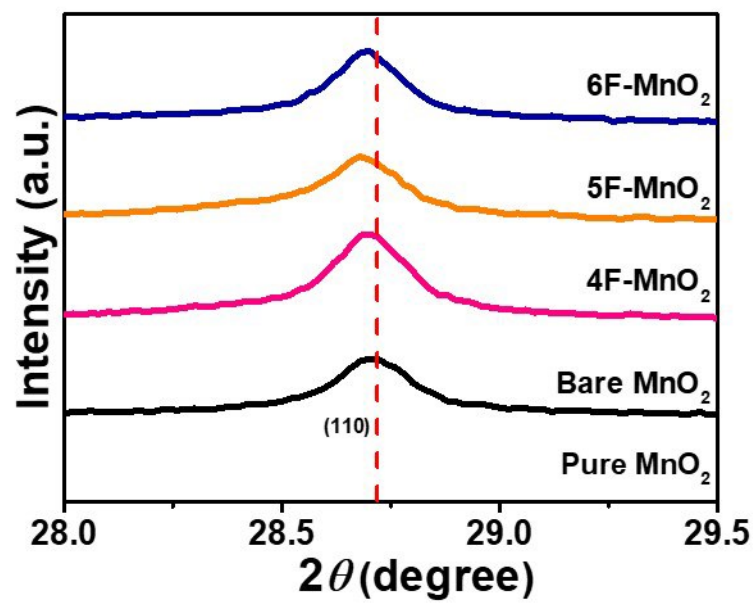

**Fig. S3.** Enlarged XRD patterns of all samples.

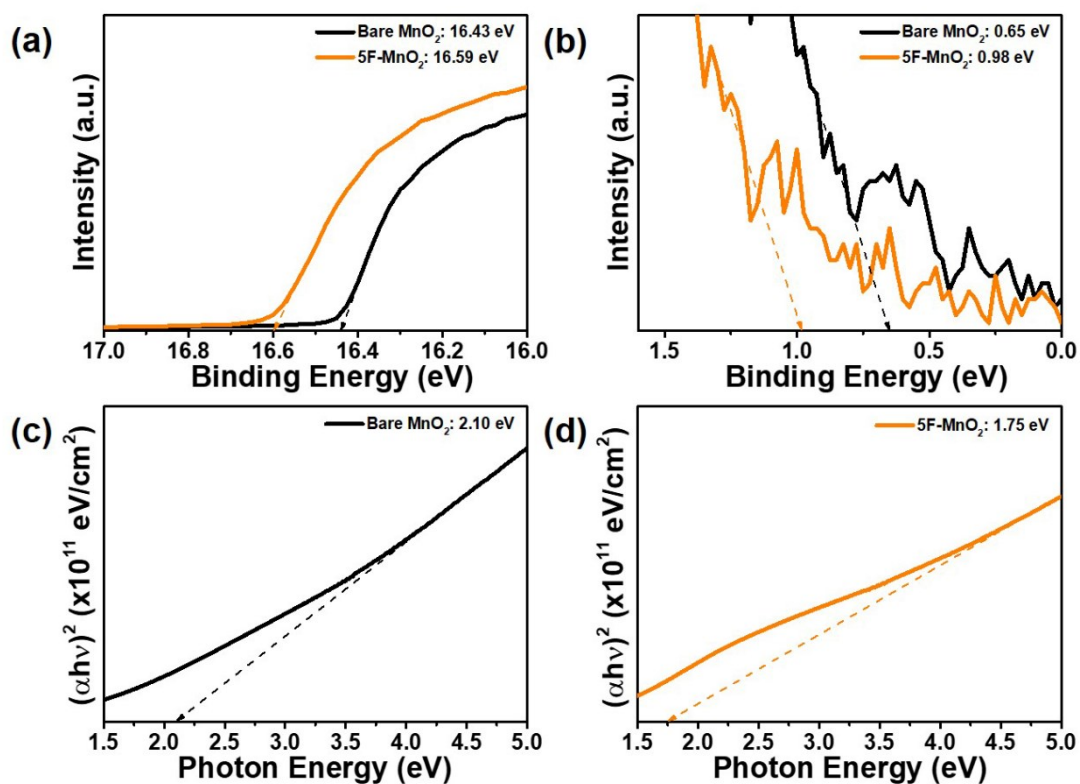

**Fig. S4.** (a) UPS spectra, (b) VBM spectra, and (c and d) curve of  $(\alpha h\nu)^2$  versus photon energy of bare  $\text{MnO}_2$  and 5F- $\text{MnO}_2$ .

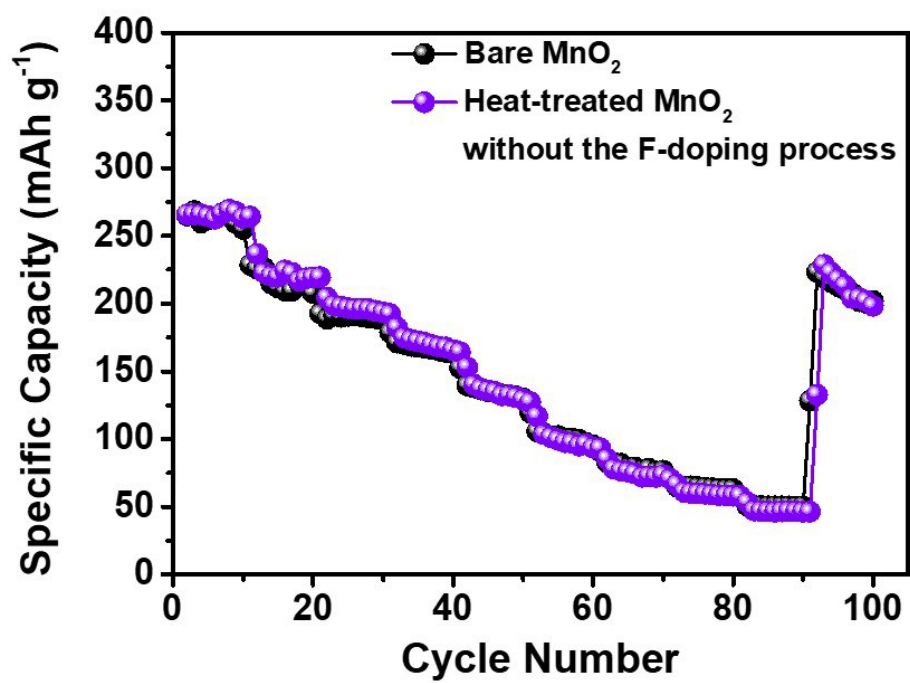

**Fig. S5.** Comparison of the rate performances between bare MnO<sub>2</sub> and heat-treated MnO<sub>2</sub> without the F-doping process.
